# HOXB7 promotes tumor progression via bFGF-induced activation of MAPK/ERK pathway and indicated poor prognosis in hepatocellular carcinoma

Wei-Min Wang<sup>1,2,\*</sup>, Yang Xu<sup>1,\*</sup>, Yao-Hui Wang<sup>3,\*</sup>, Hai-Xiang Sun<sup>1</sup>, Yun-Fan Sun<sup>1</sup>, Yi-Feng He<sup>1</sup>, Qing-Feng Zhu<sup>1,2</sup>, Bo Hu<sup>1</sup>, Xin Zhang<sup>1</sup>, Jing-Lin Xia<sup>1</sup>, Shuang-Jian Qiu<sup>1</sup>, Jian Zhou<sup>1,2</sup>, Xin-Rong Yang<sup>1</sup> and Jia Fan<sup>1,2</sup>

<sup>1</sup>Department of Liver Surgery, Liver Cancer Institute, Zhongshan Hospital, Fudan University, Key Laboratory of Carcinogenesis and Cancer Invasion, Ministry of Education, Shanghai 200032, P. R. China

<sup>2</sup>Institute of Biomedical Sciences, Fudan University, Shanghai 200032, P. R. China

<sup>3</sup>Department of Interventional Radiology, Fudan University Shanghai Cancer Center, Department of Oncology, Shanghai Medical College, Fudan University, Shanghai 200032, P. R. China

\*These authors have contributed equally to this work

**Correspondence to:** Jia Fan, **email:** jjafan99@yahoo.com  
Xin-Rong Yang, **email:** yang.xinrong@zs-hospital.sh.cn

**Keywords:** HOXB7, bFGF, hepatocellular carcinoma, prognosis, invasion and metastasis

**Received:** September 20, 2016

**Accepted:** February 06, 2017

**Published:** April 10, 2017

**Copyright:** Wang et al. This is an open-access article distributed under the terms of the Creative Commons Attribution License 3.0 (CC BY 3.0), which permits unrestricted use, distribution, and reproduction in any medium, provided the original author and source are credited.

## ABSTRACT

The homeobox-containing gene HOXB7 plays an important role in the pathogenesis and progression of many cancers, yet its role in hepatocellular carcinoma (HCC) remains unclear. This study comprehensively analyzed the expression and clinical significance of HOXB7 in HCC and explored its potential mechanism in tumor progression. We found HOXB7 was highly expressed in HCC cell lines with highly metastatic potential and cancerous tissues from patients with tumor recurrence. The abilities of proliferation, migration, and invasion were notably decreased by depletion of HOXB7, and were enhanced by its enforced expression *in vitro*. HOXB7 expression was positively correlated with tumor progression and lung metastasis *in vivo*. The gene microarray data implied that HOXB7 affects biological functions of HCC cells through MAPK/ERK pathway activation. Further study confirmed that the effect of HOXB7 in activating MAPK/ERK pathway via induction of basic fibroblast growth factor (bFGF) secretion, and the inhibition of bFGF secretion could abolish MAPK/ERK pathway activation after ectopic expression of HOXB7. Chromatin immunoprecipitation experiments and luciferase reporter assays confirmed that HOXB7 promoted bFGF secretion via binding its promoter directly. Furthermore, the clinical significance of HOXB7 expression was confirmed using tissue microarrays containing 394 HCC tissue specimens. Patients with high HOXB7 expression showed shorter survival times and higher recurrence rates, and HOXB7 was an independent indicator for survival and recurrence. Overall, HOXB7 promotes HCC cell proliferation, migration, and invasion through the bFGF-induced MAPK/ERK pathway activation. It might be a novel prognostic factor in HCC and a promising therapeutic target for tumor metastasis and recurrence.

## INTRODUCTION

Hepatocellular carcinoma (HCC) is one of the most common malignancies worldwide [1]. Although long-

term survival of HCC patients has been obtained in some clinical centers, the prognosis of HCC patients is still dismal due to the rapid progression of this disease [2]. The biologic and clinical behaviors of cancers are affected by

multiple molecular pathways, which are mainly under the control of transcription factors [3]. Thorough exploration of how transcription factors affect cancer biology may promote understanding of the mechanisms of tumor development and progression and advance the discovery of novel therapeutic strategies [4].

HOX genes, a highly conserved subgroup of the homeobox superfamily, play crucial roles in development by regulating numerous processes including apoptosis, receptor signaling, differentiation, motility, and angiogenesis. Aberrations in HOX gene expression have been associated with abnormal development and malignancy [5–7]. As a member of HOX gene family, the roles of HOXB7 in tumorigenesis have been reported in several tumor types, including leukemias, ovarian carcinoma, breast cancer, gastric cancer and colorectal cancer [8–13]. Further studies indicated that HOXB7 induces epithelial mesenchymal transition (EMT), [9] transactivates pathways involving Ras/Rho, [9] PI3K/AKT, and MAPK [8]. These results suggest that HOXB7 plays an important role in tumor development and progression. Up to now, only one study revealed HOXB7 expression was significantly higher in HCC tissues, and it was an independent prognosis factor for OS [14], but the mechanism of HOXB7 involvement in HCC progress has not been elucidated.

Our preliminary data found that HOXB7 was highly expressed in HCC tissues compared with adjacent non-cancerous tissues based on transcript profiles, suggesting that HOXB7 might play a crucial role in HCC carcinogenesis and be worth further exploring. In this study, we comprehensively analyzed the expression and clinical significance of HOXB7 in HCC and explored its potential mechanism in tumor progression. We demonstrated that HOXB7 enhances proliferation, migration, and invasion of HCC cells through bFGF-induced MAPK/ERK pathway activation, and its expression was strongly associated with tumor recurrence and poor prognosis of HCC patients after surgery.

## RESULTS

### HOXB7 expression level is positive associated with the metastatic potential of HCC cell lines and tumor recurrence

HCC cells with higher metastatic potential expressed significantly higher levels of HOXB7 mRNA and protein than the less metastatic ones (Figure 1A, 1B). Immunocytochemical analysis showed that HOXB7 protein was expressed predominantly in the nuclei of high metastatic potential HCC cells (MHCC97H and HCCLM3 cells) (Figure 1C), and the staining intensity was consistent with qRT-PCR and western blot results. These results demonstrate that HOXB7 expression was positively correlated with the metastatic potential of HCC cell lines. Moreover, western-blot analysis in tumor tissues

revealed that patients with tumor recurrence exhibited higher HOXB7 protein expression than those without recurrence ( $P<0.001$ , Figure 1D).

### HOXB7 promotes HCC cell proliferation, migration, and invasion *in vitro*

The expression of HOXB7 was measured by qRT-PCR and western blot in HCCLM3 cells after treatment with HOXB7 siRNA or in MHCC97L-HOXB7 pCDNA3 cells. HOXB7 expression was significantly inhibited after siRNA treatment (especially siRNA1083) and increased after ectopic introduction of HOXB7 (Figure 1E-1F, and Supplementary Figure 1A). The proliferation of HCCLM3 cells significantly decreased after treatment with HOXB7 siRNA, whereas proliferation of MHCC97L was significantly increased after HOXB7 up-regulation (Figure 2A and Supplementary Figure 1B). Cell cycle analysis showed that HOXB7 siRNA caused S phase arrest ( $25.48\pm 2.91\%$  vs.  $32.29\pm 2.18\%$ ,  $P<0.05$ ) and accumulation of cells in G0/G1 phase ( $52.73\pm 0.96\%$  vs.  $48.10\pm 1.82\%$ ,  $P<0.05$ ) compared with NC group (Figure 2B). Annexin V/PI staining showed that the apoptosis ratio was not significantly different between the HOXB7 siRNA and NC groups ( $P>0.05$ , Figure 2C). The wound-healing assay indicated that cell migration was significantly suppressed in HCCLM3 cells after siRNA treatment with 25  $\mu\text{g/ml}$  mitomycin C ( $P<0.01$ , Figure 2D). Transwell system assays showed that down-regulation of HOXB7 significantly suppressed the migration and invasion abilities of HCCLM3 ( $P<0.05$ , Figure 2E). In contrast, the proliferation, migration, and invasion potentials of MHCC97L were significantly enhanced by HOXB7 overexpression ( $P<0.05$ , Supplementary Figure 1B, 1D and 1E). Cell cycle analysis showed that HOXB7 overexpression reduced the number of cells in S phase and induced G0/G1 phase arrest ( $P<0.05$ , Supplementary Figure 1C).

### HOXB7 promotes HCC progression and metastasis *in vivo*

HCC cell lines with stable down-regulation of HOXB7 expression (HCCLM3-pGCSIL-GFP-HOXB7 shRNA) were identified by qRT-PCR, immunoblotting, immunofluorescence and flow cytometry (Figure 3A). Comparison of the tumors induced in mice injected with cells expressing HOXB7 shRNA and control cells is shown in Figure 3B, and representative images of tumor, lung metastasis, and HOXB7 expression by immunohistochemistry are shown in Figure 3C. Tumor weights were significantly lower in the HOXB7 shRNA group than in the control group ( $0.775\pm 0.330$  g vs.  $4.475\pm 0.126$  g,  $P<0.001$ , Figure 3D) and the formation of lung metastatic lesions was markedly decreased in the HOXB7 shRNA group ( $2.750\pm 0.957$  vs.  $21.500\pm 4.123$ ,  $P<0.001$ , Figure 3D).

Conversely, tumor weights were significantly greater in the HOXB7 overexpression group (MHCC97L-HOXB7 pCDNA3) than in controls (2.083±0.581 g vs. 1.033±0.476 g,  $P<0.01$ , Supplementary Figure 2A, 2C) and the lung metastatic ratio was significantly increased (30% vs. 0%,  $P<0.01$ , Supplementary Figure 2B, 2C).

### Gene expression profile based on microarray analysis

Microarray analysis showed that 291 genes were differentially expressed between HOXB7 siRNA-treated HCCLM3 cells and the NC-treated group. Of these, 130 genes were up-regulated (ratio >1.5), and 161 genes were down-regulated (ratio <0.67). Many of these genes, including those encoding bFGF, MAPK10, MAP3K5, IL1R2, E-cadherin, Ki67, Cyclin E1, beta-catenin, 14-3-3 protein T-cell (YWHAQ), integrin alpha-V (ITGAV), integrin alpha-10 (ITGA10), CDK6, PCNA, CDKN1A, and PAK3, are related to tumor metastasis and regulation

of cell migration (Figure 4A) [15]. Using the Kyoto Encyclopedia of Genes and Genomes, BioCarta, and Gene Map annotator and Pathway Profiler databases, the significant signaling pathways were categorized into groups that included MAPK signaling, Wnt signaling, p53 signaling, focal adhesion, and cell cycle (Supplementary Table 1). These pathways have previously been associated with carcinogenesis and metastasis [15]. Supplementary Table 1 lists the 10 pathways that are most likely to be involved in these processes. Our microarray results showed significant changes in the expression of a large number of genes involved in the MAPK pathway, such as *bFGF*, *MAPK10*, *MAP3K5*, *IL1R2*, *DUSP4*, *CDC42*, *MAP3K7IP2*, *TGFB1*, *FGF13*, *FOS*, *RASA1*, and *PRKCB1*.

Differential expression of the following genes was validated by qRT-PCR: E-cadherin, YWHAQ, ITGAV, ITGA10, CDKN1A, IL1R2, MAPK10, MAP3K5, and PAK3 (up-regulated), and bFGF, Ki67, Cyclin E1, beta-catenin, CDK6, and PCNA (down-regulated). The

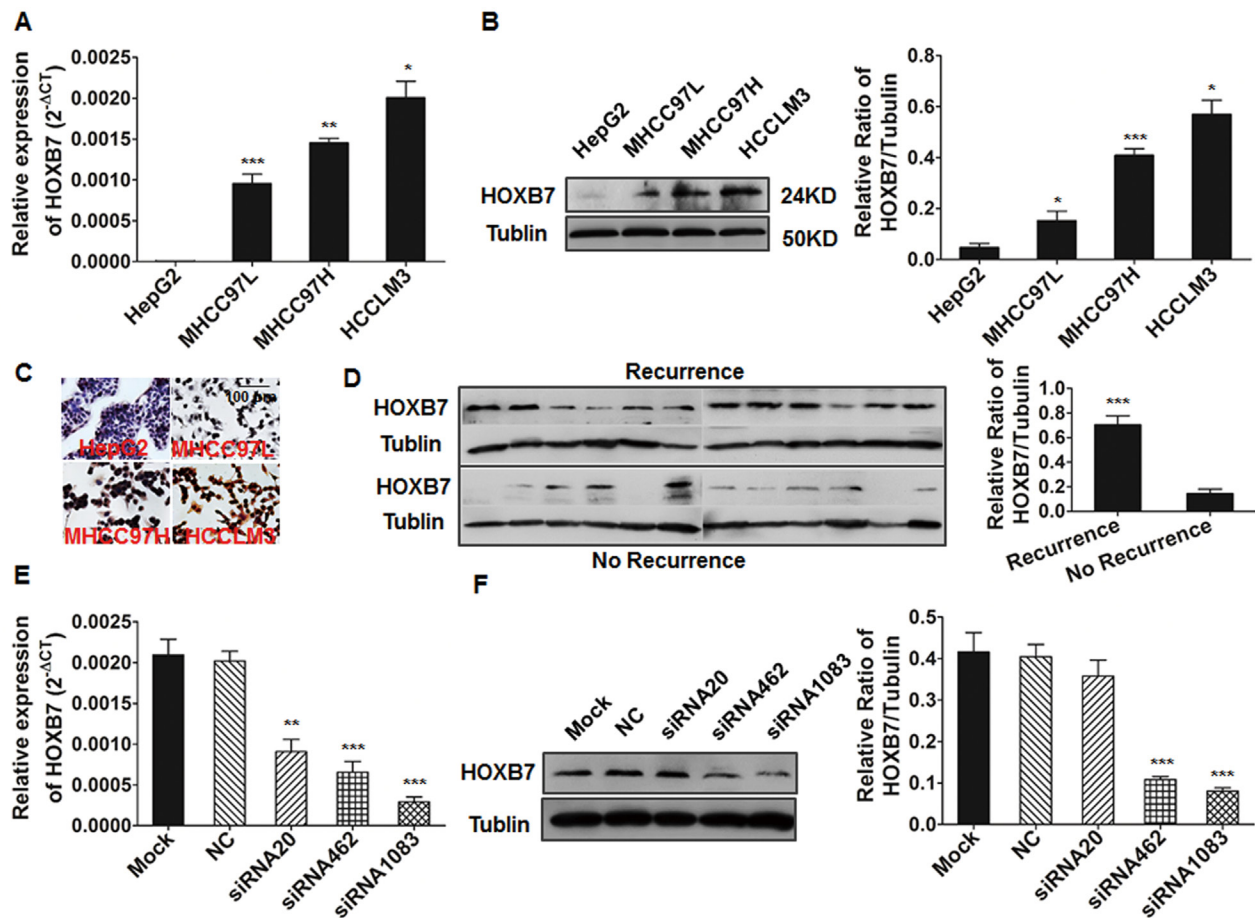

**Figure 1: The expression of HOXB7 in HCC cell lines and tumor tissues.** (A-C) qRT-PCR, Western blot and immunocytochemical analysis of HOXB7 mRNA levels and protein expression. (D) Patients suffering HCC recurrence exhibited higher HOXB7 protein levels than those without recurrence. (E, F) HOXB7 mRNA and protein expression in HCCLM3 cells treated with siRNA for 48 and 72 hours was analyzed by qRT-PCR and Western blot respectively. \*,  $P<0.05$ ; \*\*,  $P<0.01$ ; \*\*\*,  $P<0.001$ .



qRT-PCR results corresponded well with the microarray data (Figure 4B). Expression of bFGF, beta-catenin, and E-cadherin was also validated by western blotting (Figure 4C).

### HOXB7 enhances proliferation, migration, and invasion of HCC cells through activation of the MAPK/ERK signaling pathway via induction of bFGF secretion

As the most down-regulated molecule involved in MAPK pathway (the top one changed pathways significantly after HOXB7 siRNA treatment, Supplementary Table 1), the effect of bFGF on HCC and its relationship with HOXB7 was further explored.

We found that bFGF expression was consistent with the HOXB7 expression level in HCC cell lines (Figure 4A-4C). As a secreted protein, bFGF level in cell supernatant was elevated significantly after ectopic expression of HOXB7 in MHCC97L cells ( $P < 0.001$ , Figure 5Aa) and dramatically suppressed in HOXB7 shRNA-treated HCCLM3 cells ( $P < 0.001$ , Figure 5Ba).

*In vivo*, tumor tissues of MHCC97L-HOXB7 pCDNA3 mice showed higher expression levels of bFGF protein than the control group (Supplementary Figure 2D). Likewise, bFGF levels in the serum of MHCC97L-HOXB7 pCDNA3 mice were higher than in the control group by ELISA ( $P < 0.001$ , Supplementary Figure 2E). The same trend was observed in the HCCLM3 HOXB7 shRNA group and the control by western blot and

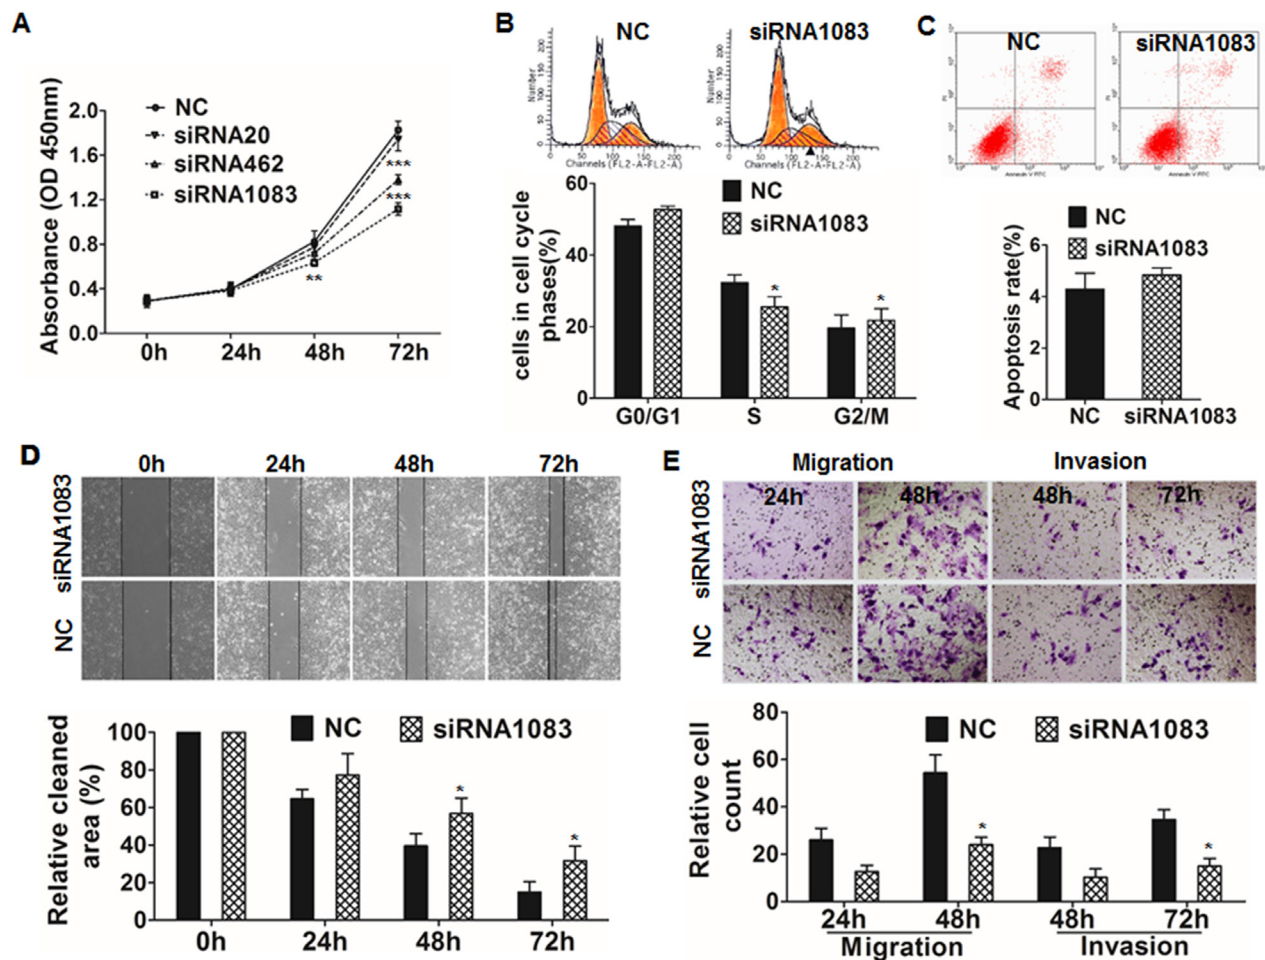

**Figure 2: Functional analysis of HOXB7 by siRNA inhibition.** (A) CCK8 assay showed that cell proliferation was significantly suppressed after HOXB7 siRNA1083 transfection for 48 and 72 hours. (B) Cell cycle analysis showed that HOXB7 siRNA1083 induced S phase arrest and increased the proportion of cells in the G0/G1 phase. (C) Treatment with siRNA1083 had no significant effect on apoptosis in HCCLM3 cells. (D) Wound healing assays revealed a significant delay in the wound closure rate of HCCLM3 siRNA1083 cells compared with control cells at 48 and 72 hours after incubated with 25  $\mu\text{g/ml}$  mitomycin C (Sigma, M4287-2MG) for 3h. (E) *In vitro* migration and invasion assays showed that the migration and invasion of the HOXB7 siRNA1083-treated group was significantly lower than that of the control group at 48 and 72 hours respectively. \*,  $P < 0.05$ ; \*\*,  $P < 0.01$ ; \*\*\*,  $P < 0.001$ .

ELISA analyses ( $P < 0.001$ , Figure 3E, 3F). Meanwhile, we also found that human tumor tissues with high HOXB7 expression showed higher bFGF expression (Supplementary Figure 3B, 3C). A scatter plot of HOXB7 and bFGF expression in 50 HCC cancer tissues revealed a significant positive correlation ( $r^2 = 0.4416$ ,  $P < 0.001$ , Supplementary Figure 3D).

We further investigated the role of bFGF in tumor cell proliferation, migration, and invasion. The proliferation ability of MHCC97L-HOXB7 pcDNA3 cells was significantly decreased after treatment with 40  $\mu$ M SU5402 for 48 and 72 hours, (Figure 5Ab, 5Ac). Addition of 25 ng/ml bFGF to the supernatant of HCCLM3 HOXB7 shRNA cells for 48 and 72 hours significantly increased cell proliferation (Figure 5Bb, 5Bc). To analyze the role of bFGF in invasion, HCCLM3 HOXB7 shRNA transfectants were incubated with 25 ng/ml bFGF in the upper chamber of a transwell plate for 72 hours. Metastasis assays were performed as for the invasion assays except without

Matrigel. The presence of bFGF significantly increased the numbers of HCCLM3 HOXB7 shRNA cells exhibiting 48-hour migration and 72-hour invasion ( $P < 0.05$ , Figure 5C).

As the top one significantly changed pathways after HOXB7 siRNA treatment, MAPK pathway might be an important one in the regulation of tumor progression by HOXB7. We further investigated the downstream genes in the MAPK pathway and found that levels of p-ERK, a member of the MAPK family, were increased in MHCC97L-HOXB7 pCDNA3 and reduced in HCCLM3 HOXB7 shRNA compared with respective controls. It implied that expression of p-ERK is positively correlated to the HOXB7 level. Addition of 40  $\mu$ M SU5402 to the MHCC97L-HOXB7 pCDNA3 culture medium significantly decreased the expression of p-ERK expression but had no effect on expression of ERK (Figure 4D). Thus, we speculated that HOXB7 affects biological functions of HCC cells through the bFGF-induced MAPK/ERK pathway activation.

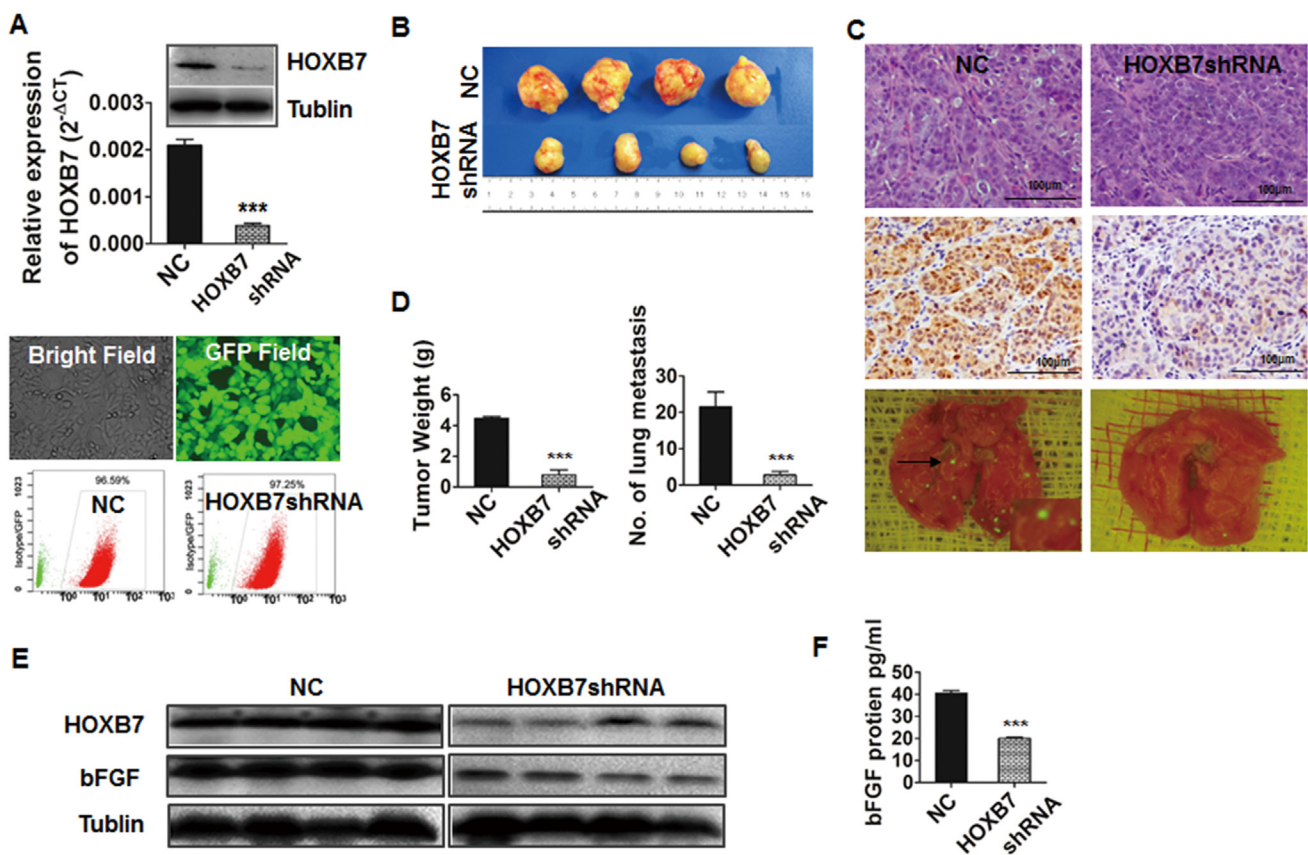

**Figure 3: Down-regulation of HOXB7 suppress tumor growth and metastasis *in vivo*.** (A) HOXB7 expression in HCCLM3-pGCSIL-GFP and HCCLM3-pGCSIL-GFP-HOXB7 shRNA cells was measured by qRT-PCR, western blot analysis and immunofluorescence, flow cytometry assays. (B) Morphologic characteristics of tumors in the two groups. (C) Representative images of tumor specimens, HOXB7 expression by immunohistochemistry, and lung metastases by immunofluorescence in the two groups. (D) Tumor weight and lung metastatic lesions were significantly different between the two groups. (E) Decreased expression of HOXB7 and bFGF proteins in HOXB7 shRNA tumor tissues, and (F) lower serum bFGF level of mice in this group. \*\*\*,  $P < 0.001$ .



## HOXB7 activates MAPK/ERK signaling pathway via direct target bFGF in HCC cells

To further confirm the transcriptional regulation of the bFGF gene by HOXB7, we performed CHIP and luciferase reporter assays in HCCLM3 cells. We found that bFGF promoter-specific PCR primers amplified this promoter region from DNA that was immunoprecipitated with the anti-HOXB7 antibody but not with the nonimmune IgG (Figure 4E). These findings demonstrated that the HOXB7 protein could target and interacts with the promoter regions of bFGF in HCCLM3 cells, and then induced bFGF secretion through physically binding bFGF promoter.

We found that bFGF could increase the MAPK/ERK transcription factor (SRE) luciferase reporter activity, and this effect was enhanced or inversed when HOXB7

pcDNA3 or SU5402 was respectively added. bFGF and HOXB7pcDNA3 cotransfection could obviously increase the promoter luciferase reporters activity of SRE, while SU5402 with HOXB7pcDNA3 could restrain SRE ( $P < 0.001$ , Figure 4F).

Luciferase reporter activity assays showed that HOXB7 overexpression and bFGF significantly increased MAPK/ERK reporter activity and the effect was blocked by treatment with the SU5402. These results suggested that bFGF can activate the MAPK/ERK promoter, and then induced the activation of MAPK pathway.

## High HOXB7 expression predicts poor prognosis in HCC patients

HOXB7 protein was predominantly detected in the nuclei of tumor cells, although cytoplasmic staining was

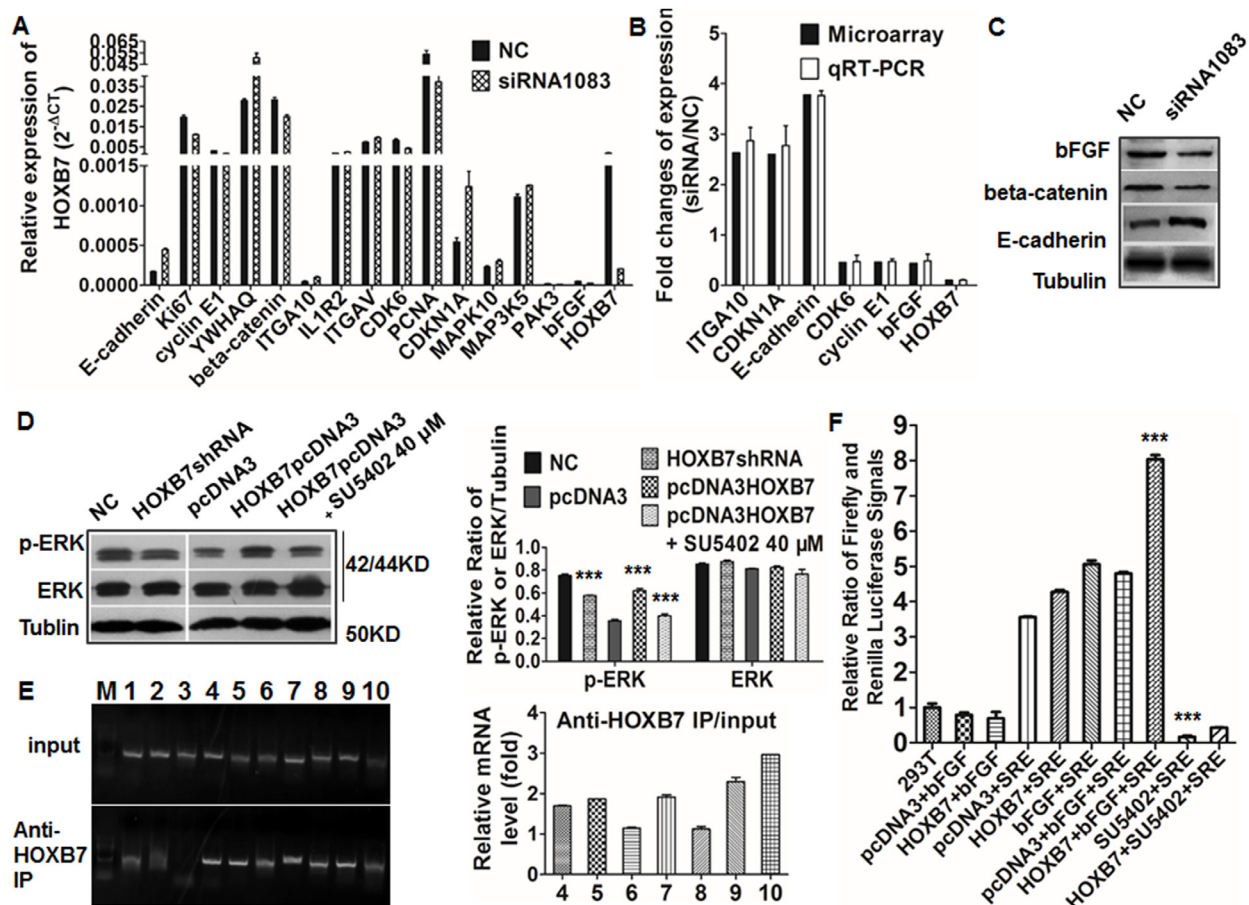

**Figure 4: Validation gene changes after HOXB7 siRNA and its interaction with bFGF.** (A and B) Microarray experiments identified several genes that were differentially expressed between the siRNA group and the control group, and these findings were validated by qRT-PCR. (C) Expression of bFGF, beta-catenin, and E-cadherin in the siRNA and control group by western blot. (D) Expression of p-ERK was up-regulated in MHCC97L-HOXB7 pcDNA3 cells and down-regulated in HCCLM3-pGCSIL-GFP-HOXB7 shRNA cells, and SU5402 was down-regulated the expression of p-ERK in MHCC97L-HOXB7 pcDNA3 cells. (E) bFGF promoter-specific PCR primers could amplify this promoter region from DNA that was immunoprecipitated with the anti-HOXB7 antibody but not with the nonimmune IgG. (F) HOXB7 and bFGF significantly increased SRE luciferase reporter activity, while SU5402 could restrain it. (\*\*\*,  $P < 0.001$ ).

also observed. The expression of HOXB7 in cancer tissues was classified as high (score  $\geq 6$ ) in 181 cases (45.9%) and low (score 0-5) in 213 cases (54.1%), whereas there were almost no cases of high HOXB7 expression in adjacent non-cancerous tissues (data not shown). Representative images and statistical data are shown in Supplementary Figure 3A and Table 1. High HOXB7 expression was significantly correlated with several clinicopathologic parameters, including multiple tumors ( $P=0.007$ ), vascular invasion ( $P=0.010$ ), satellite lesion ( $P=0.003$ ), and Barcelona Clinic Liver Cancer (BCLC) Stage B+C ( $P=0.003$ ) (Table 1).

At the last follow-up, 49.5% (195/394) of the patients had suffered a recurrence and 41.6% (164/394)

had died. The 1-, 3-, 5- and 8-year OS rates were 88.6%, 66.5%, 51.5%, and 42.9%, respectively, and corresponding cumulative recurrence rates were 30.0%, 54.1%, 59.4%, and 72.1%. In univariate analysis, alpha-fetoprotein (AFP) level, gamma-glutamyl transpeptidase (GGT) level, tumor size, tumor number, vascular invasion, tumor encapsulation, satellite lesion, BCLC stage, and HOXB7 expression were unfavorable predictors for OS and/or TTR (except tumor size) (Table 2). HOXB7 was found to be prognostic for OS (HR=1.719, 95% confidence interval (CI) 1.325-2.229,  $P<0.001$ ) and TTR (HR=1.645, 95%CI 1.294-2.092,  $P<0.001$ ) (Figure 6A, 6B). Further multivariate analysis indicated that HOXB7 was an independent prognostic factor for OS (HR=1.188, 95%CI

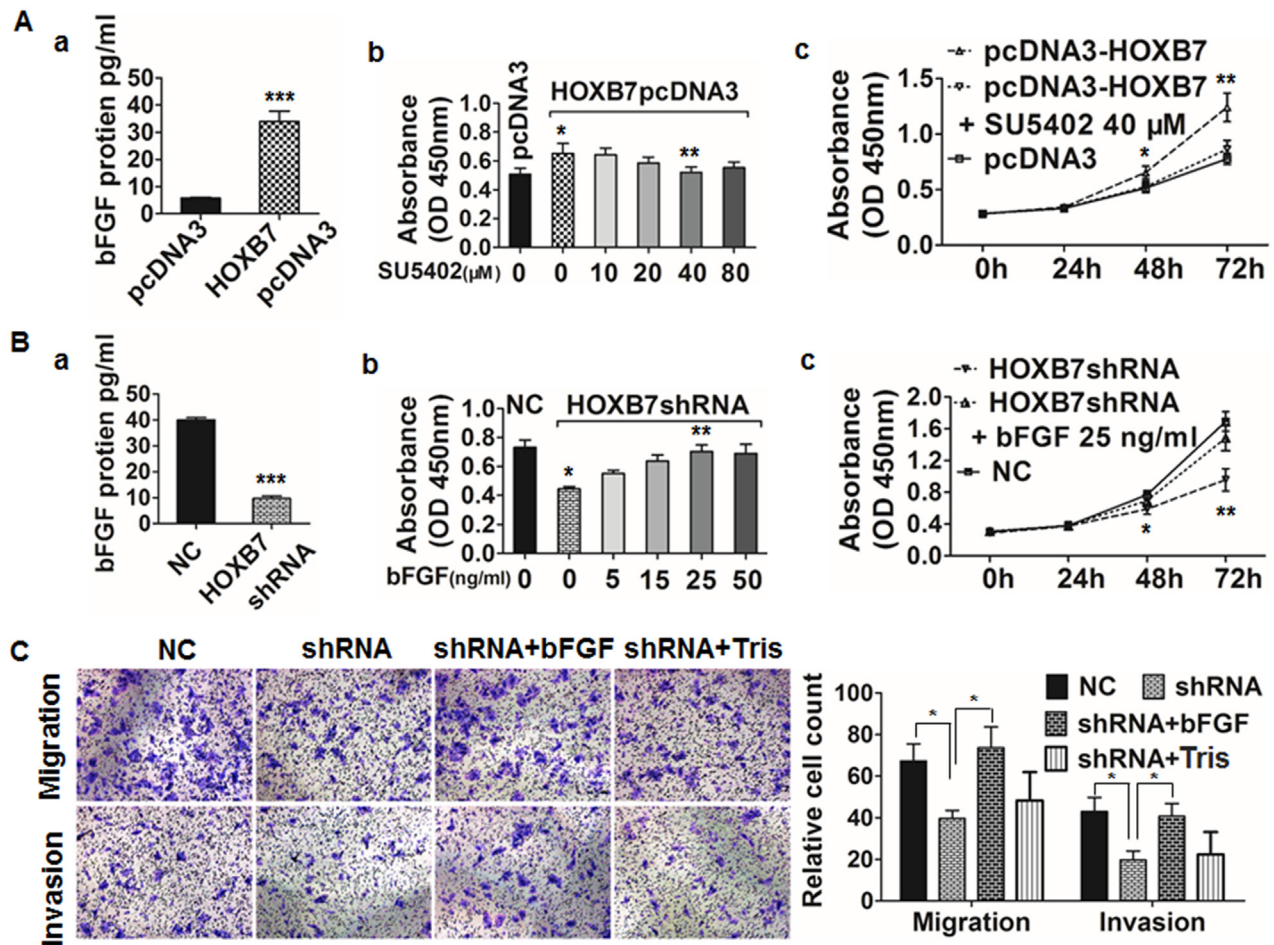

**Figure 5: HOXB7 enhances HCC cell proliferation, migration, and invasion via induction of bFGF secretion.** (A) The level of bFGF secreted by MHCC97L-HOXB7 pCDNA3 cells was higher than that in the control group. The proliferation of HOXB7 pCDNA3 cells significantly increased than the control group at 48 hours. SU5402 inhibited the proliferation especially at 40  $\mu$ M. The cell proliferation was significantly inhibited using 40  $\mu$ M SU5402 for 48 hours and 72 hours in HOXB7 pCDNA3 cells. (B) The decreased bFGF level was detected in supernatant of HCCLM3-pGCSIL-GFP-HOXB7 shRNA cells, the proliferation of HOXB7 shRNA cells decreased significantly than the control at 48 hours and bFGF increased the proliferation especially at 25 ng/ml, the cell proliferation ability was significantly enhanced after adding 25 ng/ml bFGF to HOXB7 shRNA cells for 48 and 72 hours. (C) *In vitro* migration and invasion assays showed a significant decrease in the HCCLM3 HOXB7 shRNA group compared with the control group at 48 and 72 hours, respectively, and was partially reversed by adding 25 ng/ml bFGF to the upper chamber, not by 5mM Tris (bFGF supplementation). (\*,  $P<0.05$ ; \*\*,  $P<0.01$ ; \*\*\*,  $P<0.001$ ).

**Table 1: Correlation between the factors and clinicopathologic characteristics in 394 patients**

| Clinical and pathological indexes |          | HOXB7 |     |                    |
|-----------------------------------|----------|-------|-----|--------------------|
|                                   |          | High  | Low | <i>P</i>           |
| Age (years)                       | >50      | 86    | 108 | 0.528              |
|                                   | ≤50      | 95    | 105 |                    |
| Sex                               | Male     | 163   | 181 | 0.131              |
|                                   | Female   | 18    | 32  |                    |
| AFP (ng/ml)                       | >20      | 120   | 133 | 0.426              |
|                                   | ≤20      | 61    | 80  |                    |
| HBsAg                             | Positive | 153   | 170 | 0.225              |
|                                   | Negative | 28    | 43  |                    |
| HCV                               | Positive | 6     | 3   | 0.312 <sup>Δ</sup> |
|                                   | Negative | 175   | 210 |                    |
| GGT (U/l)                         | >54      | 113   | 118 | 0.158              |
|                                   | ≤54      | 68    | 95  |                    |
| ALT (U/l)                         | >75      | 18    | 19  | 0.728              |
|                                   | ≤75      | 163   | 194 |                    |
| Liver cirrhosis                   | Yes      | 153   | 167 | 0.121              |
|                                   | No       | 28    | 46  |                    |
| Tumor size                        | >5       | 82    | 84  | 0.240              |
|                                   | ≤5       | 99    | 129 |                    |
| Tumor number                      | Multiple | 47    | 32  | <b>0.007</b>       |
|                                   | Single   | 134   | 181 |                    |
| Vascular invasion                 | Yes      | 56    | 42  | <b>0.010</b>       |
|                                   | No       | 125   | 171 |                    |
| Tumor encapsulation               | None     | 78    | 85  | 0.522              |
|                                   | Complete | 103   | 128 |                    |
| Satellite lesion                  | Yes      | 25    | 11  | <b>0.003</b>       |
|                                   | No       | 202   | 156 |                    |
| Edmondson Stage                   | III-IV   | 73    | 62  | 0.997              |
|                                   | I-II     | 119   | 140 |                    |
| Child-Pugh Stage                  | B        | 6     | 13  | 0.198              |
|                                   | A        | 175   | 200 |                    |
| BCLC Stage                        | B+C      | 52    | 35  | <b>0.003</b>       |
|                                   | 0+A      | 129   | 178 |                    |

Abbreviations: AFP, alpha-fetoprotein; GGT, gamma glutamyl transferase; BCLC, Barcelona Clinic Liver Cancer; HBsAg, hepatitis B surface antigen; HCV, hepatitis C virus;

<sup>Δ</sup> Fisher's exact tests; Chi-square tests for all the other analyses.



**Table 2: Univariate and multivariate analyses of prognostic factors in 394 HCC patients**

| Variables                              | OS                 |                    | TTR                |                    |
|----------------------------------------|--------------------|--------------------|--------------------|--------------------|
|                                        | HR (95% CI)        | P                  | HR (95% CI)        | P                  |
| <b>Univariate analysis</b>             |                    |                    |                    |                    |
| Age (years)( >50 vs. ≤50)              | 0.584(0.718-1.205) | 0.584              | 0.927(0.730-1.177) | 0.927              |
| Sex (Male vs. Female)                  | 1.206(0.796-1.827) | 0.377              | 1.147(0.789-1.667) | 0.474              |
| AFP (ng/ml) (>20 vs. ≤20)              | 1.610(1.214-2.135) | <b>0.001</b>       | 1.367(1.061-1.760) | <b>0.016</b>       |
| HBsAg (Positive vs.Negative)           | 1.417(0.989-2.031) | 0.058              | 1.313(0.948-1.820) | 0.102              |
| HCV (Positive vs. Negative)            | 1.094(0.486-2.462) | 0.828 <sup>A</sup> | 0.899(0.400-2.019) | 0.796 <sup>A</sup> |
| GGT (U/l) (>54 vs. ≤54)                | 1.644(1.252-2.159) | <b>&lt;0.001</b>   | 1.538(1.200-1.972) | <b>0.001</b>       |
| ALT (U/l)( >75 vs. ≤75)                | 0.919(0.581-1.454) | 0.718              | 0.809(0.528-1.241) | 0.333              |
| Tumor size (cm) (>5 vs. ≤5)            | 1.461(1.126-1.894) | <b>0.004</b>       | 1.224(0.961-1.558) | 0.101              |
| Tumor number(Multiple vs. Single)      | 2.082(1.550-2.796) | <b>&lt;0.001</b>   | 2.210(1.671-2.923) | <b>&lt;0.001</b>   |
| Vascular invasion (Yes vs. No)         | 1.793(1.351-2.379) | <b>&lt;0.001</b>   | 1.761(1.350-2.296) | <b>&lt;0.001</b>   |
| Tumor encapsulation(None vs. Complete) | 1.427(1.100-1.850) | <b>0.007</b>       | 1.331(1.046-1.693) | <b>0.020</b>       |
| Satellite lesion (Yes vs. No)          | 1.651(1.089-2.502) | <b>0.018</b>       | 1.639(1.101-2.441) | <b>0.015</b>       |
| Edmondson Stage (III-IV vs. I-II)      | 1.068(0.814-1.401) | 0.636              | 1.057(0.823-1.358) | 0.662              |
| Child-Pugh (B vs. A)                   | 1.339(0.765-2.345) | 0.307              | 1.434(0.865-2.379) | 0.162              |
| BCLC Stage (C+D vs. A+B)               | 2.601(1.960-3.451) | <b>&lt;0.001</b>   | 2.663(2.034-3.486) | <b>&lt;0.001</b>   |
| HOXB7 (High vs. Low)                   | 1.719(1.325-2.229) | <b>&lt;0.001</b>   | 1.645(1.294-2.092) | <b>&lt;0.001</b>   |
| <b>Multivariate analysis</b>           |                    |                    |                    |                    |
| Tumor size (cm) (>5 vs. ≤5)            | 1.352(1.023-1.787) | <b>0.034</b>       | n.a.               |                    |
| Tumor number(Multiple vs. Single)      | 1.660(1.191-2.314) | <b>0.003</b>       | 1.882(1.375-2.575) | <b>&lt;0.001</b>   |
| Vascular invasion(Yes vs. No)          | 1.428(1.056-1.931) | <b>0.021</b>       | 1.384(1.046-1.832) | <b>0.023</b>       |
| Tumor encapsulation(None vs. Complete) | 1.130(0.853-1.498) | 0.393              | 1.046(0.808-1.353) | 0.735              |
| Satellite lesion (Yes vs. No)          | 0.898(0.566-1.425) | 0.649              | 0.875(0.561-1.365) | 0.557              |
| HOXB7(High vs.Low)                     | 1.188(1.039-1.359) | <b>0.012</b>       | 1.413(1.102-1.813) | <b>0.006</b>       |

NOTE: <sup>A</sup>Fisher's exact tests; Chi-square tests for all the other analyses.

Abbreviations: OS, overall survival; TTR, time to recurrence; HR, hazard ratio; 95% CI, 95% confidence interval; AFP, alpha-fetoprotein; HBsAg, hepatitis B surface antigen; HCV, hepatitis C virus; GGT, gamma glutamyl transferase; ALT, alanine aminotransferase; BCLC, Barcelona Clinic Liver Cancer; TNM, tumor-node-metastasis; n.a., not adopted.

1.039-1.359,  $P=0.012$ ) and TTR (HR=1.413, 95%CI 1.102-1.813,  $P=0.006$ ) (Table 2). We further investigated the predictive value of HOXB7 within clinical subgroups of early-stage, well-differentiated, and normal AFP ( $\leq 20$  ng/ml). The prognostic significance of HOXB7 persisted in HCC patients with a single tumor ( $P=0.001$ ),

without vascular invasion ( $P<0.001$ ), BCLC stage 0+A ( $P=0.001$ ), with normal AFP levels ( $P=0.01$ ), small tumor size (diameter  $\leq 5$  cm) ( $P=0.01$ ), without satellite lesion ( $P<0.001$ ) and with well-differentiated tumor (Edmonson stage I-II) ( $P<0.01$ ) (Figure 6C-6F and Supplementary Figure 4).

## DISCUSSION

It is very important to identify the factors associated with tumor recurrence and metastasis because these are the most common causes of mortality after surgical treatment of HCC [16]. In this study, we showed that the homeobox protein HOXB7 was overexpressed in HCC tissues compared with adjacent non-cancerous tissues, in highly metastatic HCC cell lines, and in patients with tumor recurrence, but was barely detected in low-metastatic HCC cells or HCC tissues of patients without recurrence. A positive correlation between HOXB7 expression and

multiple tumors, satellite lesions, vascular invasion, and more advanced tumor stage indicated that HOXB7-positive tumor cells have a more aggressive phenotype. *In vitro* depletion or overexpression experiments showed that HOXB7 promotes tumor cell proliferation, migration, and invasion in HCC. Further investigation indicated that HOXB7 is a potent inducer of bFGF secretion and activates the MAPK/ERK signaling pathway, which had previously been advocated as an important mechanism during HCC invasion transformation and metastasis [17]. The roles of HOXB7 in enhancing the proliferation of tumor cells, as well as promoting migration and

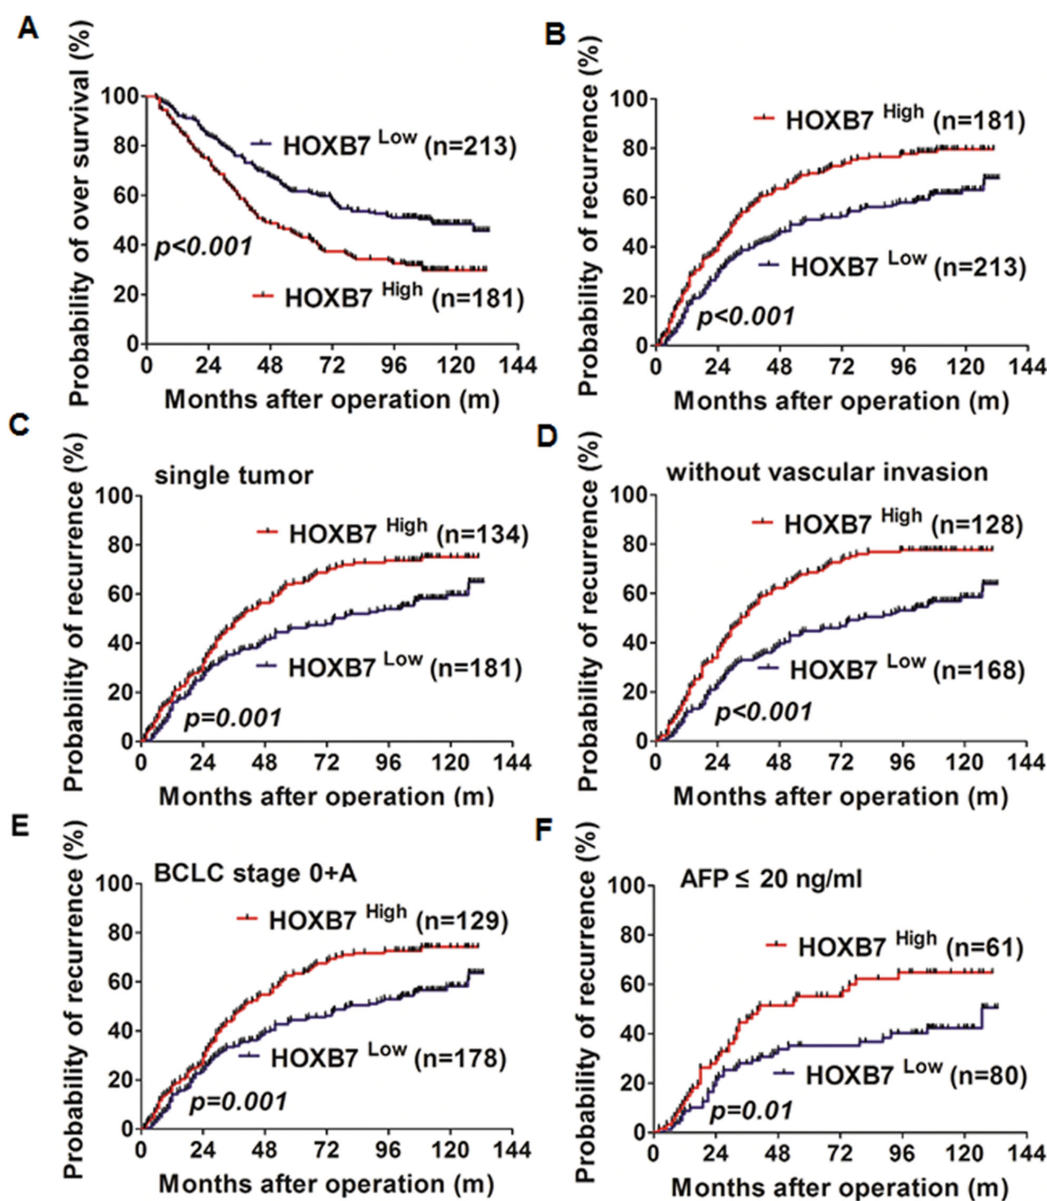

**Figure 6: HOXB7 and prognosis of HCC.** (A, B) Kaplan-Meier analysis of OS and cumulative recurrence rates in 394 cases based on HOXB7 expression. Prognostic role of HOXB7 in patients with single tumor (C), without vascular invasion (D), BCLC stage 0+A (E), and AFP  $\leq 20$  ng/ml (F).

invasion functions of cancer cells during hematogenous dissemination, are presumably responsible for the high recurrence rate and poor prognosis observed in HOXB7-positive HCC patients. Furthermore, from a therapeutic viewpoint our data indicate that molecular therapies targeting HOXB7 in HCC might be a promising approach to blocking tumor progression.

Our results confirmed HOXB7 as an independent significant risk factor for tumor recurrence and survival after curative resection, and it was in accordance with one recently study [14]. In clinical practice it is challenging to predict tumor relapse in HCC subgroups with a low risk of recurrence, such as single tumor, small tumor, without vascular invasion, absence of satellite lesion, BCLC stage 0+A, and well-differentiated tumor [18]. We found that HOXB7 retained prognostic value in these subpopulations. The predictive significance of HOXB7 in these subgroups would help clinicians identify patients at high risk of recurrence and enable them to administer rational adjuvant therapy after surgery. Currently, AFP is widely used to monitor recurrence and metastasis in AFP-positive HCC patients after surgery [19]. However, 40% to 60% of HCC patients exhibit normal AFP levels, and it is difficult to surveillance the metastasis and recurrence in those patients after resection [18, 20]. In this study, we found that 61 patients in the AFP-normal group (43.3%) expressed high levels of HOXB7, and the prognosis of these patients was dismal. The median TTR in HOXB7-high patients was 24 months, compared with 101.8 months in the HOXB7-low group, and most of the HOXB7-high patients (65.6%) died from HCC recurrence within 5 years. Thus, HOXB7 might be a useful predictor for HCC patients in subgroups for which prognosis is very difficult to predict using conventional clinical indexes.

Until now, the function of HOXB7 in HCC and the underlying mechanisms were not clear. Using a human whole genome oligomicroarray, we explored the potential molecular mechanism of HOXB7 by identifying genes that are differentially expressed between HCC cells treated with HOXB7 siRNA and those treated with scrambled siRNA. Our data indicated that HOXB7 participates in several signaling pathways involved in tumor development and progression, such as the MAPK pathway, Wnt signaling pathway, p53 signaling pathway, focal adhesion, and cell cycle. Among the 161 down-regulated genes, only bFGF has previously been documented to be involved in HOXB7 regulation [9]. Other candidate genes that appear to directly or indirectly regulate by HOXB7, such as those encoding Ki67, cyclin E1, beta-catenin, CDK6, and PCNA, have not been reported previously. Among the 130 up-regulated genes, those encoding E-cadherin, MAPK10, MAP3K5, and PAK3 have been confirmed to inhibit tumor proliferation or invasion [21–24].

Further bioinformatics analysis showed that a large number of genes involved in the MAPK pathway were differentially regulated, suggesting that the MAPK pathway might play an important role in the mechanism by which HOXB7 participates in HCC progression. Gene microarray data and qRT-PCR analysis confirmed that bFGF expression dramatically decreased after siRNA treatment of HCCLM3 cells (>2.0 fold) (Figure 4A-4C). The high expression of bFGF was observed in both MHCC97L-HOXB7 pCDNA3 cells and the corresponding xenograft tumors, while it was low in HCCLM3-pGCSIL-GFP-HOXB7 shRNA cells and tumors (Figure 3E-3F, 5A-5B and Supplementary Figure 2D-2E). A significant positive correlation between bFGF and HOXB7 expression was found in 50 HCC cancerous tissues (Supplementary Figure 3B-3D). Moreover, inhibition of the bFGF autocrine signaling cascade using the FGF receptor inhibitor SU5402 suppressed the proliferation of MHCC97L-HOXB7 pCDNA3 cells (Figure 5Ab), while recombinant human FGF-basic (bFGF) increased the proliferation, migration, and invasion of HCCLM3-pGCSIL-GFP-HOXB7 shRNA cells (Figure 5Bb c and 5C). Using CHIP and luciferase reporter genes assays, we found that HOXB7 can stimulate bFGF secretion through binding the bFGF promoter directly, then activate MAPK/ERK signaling, and this is the first demonstration for the interaction of HOXB7 and bFGF in HCC (Figure 4E, 4F). Further study showed that obstructing FGF signaling by SU5402 could attenuate activation of the ERK pathway in MHCC97L-HOXB7 pCDNA3, suggesting that the biological functions of bFGF in promoting tumor proliferation and invasion were through activating MAPK/ERK signaling (Figure 4D). Taking together, these data indicate that HOXB7 promotes HCC progression and metastasis through activating the secretion of bFGF and subsequently triggering MAPK/ERK pathways and ERK phosphorylation to regulate HCC proliferation, migration, and invasion. Further studies on HOXB7 target genes and their regulation will provide new insights into the underlying mechanisms.

Limitations of our study include its retrospective nature and the fact that most of the patients had a background of hepatitis B infection. Thus, the prognostic significance of HOXB7 needs further validation using larger and more diverse patient cohorts. Meanwhile, more intensive research into the molecular mechanism of HOXB7 functions in HCC need to be further undertaken.

In conclusion, this study demonstrates that HOXB7 promotes HCC cell proliferation, invasion, and metastasis through activation of the MAPK/ERK pathway by stimulating bFGF secretion. HOXB7 expression serves as a novel prognostic indicator for HCC patients undergoing curative resection. Cancer therapy targeted against HOXB7 might be a promising approach for the treatment of HCC metastasis and recurrence.



## MATERIALS AND METHODS

### Cells and transfection, expression, and functional assays

HepG2 and 293T cells used in Luciferase Reporter Assay were obtained from the Shanghai Institute for Biological Science (Shanghai, China). MHCC97L, MHCC97H, and HCCLM3 with stepwise metastatic potential were established at our institute [25]. They were routinely maintained in high-glucose DMEM with 10% FBS (Gibco). Three pairs of HOXB7 small interfering RNA (siRNA) oligos (siRNA20, sense GGACUCUAAUUCUGUAAUATT and antisense UAUUACAGAAUUAGAGUCCTT; siRNA462, sense GAGAGUAAUCUCCGGAUCUTT and antisense AGAUCCGGAAGUUACUCUCTT; siRNA1083, sense GCUAUUGUAAAGGUCUUUGUTT and antisense ACAAAGACCUUACAAUAGCTT) and a negative control (NC) (sense UUCUCCGAACGUGUCACGUTT and antisense ACGUGACACGUUCGGAGAATT) were synthesized by Genepharma and transfected into HCCLM3 cells using Lipofectamine 2000 (Invitrogen). HOXB7-pCDNA3 plasmid was kindly provided by Dr. Judith Gasson (University of California at Los Angeles, CA) [26] and pCDNA3 vector was purchased from Invitrogen. pGCSIL-HOXB7, a HOXB7-RNA interference (RNAi) lentiviral vector, was constructed by Shanghai GeneChem Co. Double-stranded oligonucleotides encoding human HOXB7-vshRNA (reverse primer: 5'-CCTCACGGAAAGACAGATCAATC TCTTGAATTGATCTGTCTTTCCGTGAGG-3'; forward primer: 5'-CCTCACGGAAAGACAGATCAATTCAAGA GATTGATCTGTCTTTCCGTGAGG-3'; target sequence: 5'-CCTCACGGAAAGACAGATCAA-3') were annealed and inserted into the shRNA lentiviral expression vector pGCSIL-green fluorescent protein (GFP). pGCSIL-GFP alone was used as a NC. HOXB7-pCDNA3 and pGCSIL-GFP-HOXB7 shRNA were transfected into MHCC97L (to give MHCC97L-HOXB7 pCDNA3) and HCCLM3 (to give HCCLM3-pGCSIL-GFP-HOXB7 shRNA) using Lipofectamine 2000 and Polybrene (Sigma-Aldrich) respectively. pCDNA3 and pGCSIL-GFP vectors were used as controls (MHCC97L-pCDNA3 and HCCLM3-pGCSIL-GFP). MHCC97L-HOXB7 pCDNA3 and MHCC97L-pCDNA3 cells were selected in medium containing 0.7 mg/mL G418 (Sigma-Aldrich) for 5 weeks to establish stable neomycin-resistant clones. HCCLM3-pGCSIL-GFP-NC and HCCLM3-pGCSIL-GFP-HOXB7 shRNA cells were selected and confirmed by flow cytometry (BD Biosciences, CA, USA). All procedures were performed according to the manufacturers' instructions. Expression levels of HOXB7 in transfected cells were confirmed by qRT-PCR, immunoblotting, immunofluorescence, or flow cytometric analysis. The methods were performed

according to the manufacturer's recommendations and previously described [27, 28]. The details of primers used are given in Supplementary Table 2.

Cell proliferation, cell cycle distribution and cell apoptosis were detected using the Cell Counting Kit-8 (CCK-8) (Beyotime, China), Cell Cycle Analysis Kit (Beyotime) and Annexin V-FITC/PI Apoptosis Detection kit (BD Biosciences, CA, USA) respectively according to the manufacturer's protocol and previously described [29, 30]. Cell Migration, and Matrigel Invasion Assays were performed as previously described [9, 31–33].

### Animals and *in vivo* assays for tumor growth and distant metastasis

The procedures were performed as previous reports [29, 31, 32]. Briefly, Male athymic BALB/c nude mice (4-6 weeks old; Shanghai Institute of Material Medicine) were raised.  $5 \times 10^6$  cells were subcutaneously injected into the flanks of mice. After 5 weeks, mice were sacrificed, the tumors were harvested, serum and protein were extracted, and the weight of tumors and the metastatic lesions of lung were calculated as previously described [34]. Tumor tissue sections were prepared and HOXB7 immunoreactivity (Abnova, Taipei, China) was analyzed. All procedures were approved by The Animal Care and Use Committee of Fudan University, Shanghai, China.

### Microarray-based gene expression profile

A microarray assay was performed to compare the gene expression profiles between HOXB7 siRNA1083-treated and NC-treated HCCLM3 cells. The 22-K oligonucleotide microarrays were constructed by Capital Bio Corp (Beijing, China). Differences in gene expression profiles between the two groups were analyzed as previously reported [34]. To confirm the microarray results, several differentially expressed genes were further analyzed by qRT-PCR or western blotting.

### Enzyme-linked immunosorbent assay (ELISA)

bFGF levels in cell supernatants, mouse serum, and 50 cancerous tissues were determined using ELISA according to the manufacturer's protocol (R&D Systems) and previous studies [30].

### The effect of FGF receptor 1 (FGFR1) signaling pathway inhibitor and recombinant human bFGF in HCC cell lines

Cells were cultured in 96-well plates (3,000 cells/100  $\mu$ l/well) for 12 hours and serum starved for 24 hours. Cells were treated with SU5402 (0, 10, 20, 40, and 80  $\mu$ M) (Calbiochem, San Diego, CA), an inhibitor of

FGFR1 signaling pathway, [35–37] or recombinant human bFGF (0, 5, 15, 25, and 50 ng/ml) (PeproTech, Rocky Hill, NJ) [12, 37] for 48 hours in DMEM containing 3% FBS. Concentrations of 40  $\mu$ M SU5402 and 25 ng/ml bFGF were then selected for subsequent treatment of cells for 24, 48, and 72 hours. Cell proliferation was determined by CCK8 analysis.

### Chromatin immunoprecipitation (CHIP) and luciferase reporter assays

To elucidate the mechanism of HOXB7 regulates, CHIP and luciferase reporter assays were then performed as described previously [38]. HCCLM3 were fixed in 1% (vol/vol) formaldehyde for 10 minutes. Then fixation was quenched in 125 mmol/L glycine for 5 minutes. Nuclei were disrupted with 1% SDS lysis buffer for 15 minutes. Samples then were sonicated to shear DNA to 200~1000 bp. Supernatants obtained after centrifugation at 13,000 $\times$ g for 10 min were used for immunoprecipitations using an anti-HOXB7 antibody (SC-133670 and SC-81292, SantaCruz) or control IgG overnight at 4°C with rocking. The protein-DNA complex was collected with IgG beads (Roche). Crosslinking was reversed by incubation at 65°C for 1.5 hours and digested with Proteinase K (Sigma-Aldrich) at 45°C for 2 hours. DNA was purified using a Qiaquick PCR purification kit (Qiagen). The recovered DNA was resuspended in Tris-HCl EDTA buffer and used for the PCR amplification. Total cellular DNA was used as input control. The PCR primers for the target promoters (bFGF) are listed in Supplementary Table 3.

293T cells cultured in 96-well plates (40,000 cells/100  $\mu$ l Opti-MEM/well) were cotransfected with 200 ng of HOXB7-pCDNA3 plasmid and SRE Reporter which represent MAPK/ERK Pathway (Cignal SRE Reporter (luc) Kit, SABiosciences) according to Cignal Reporter Assay Handbook. After 36 hours, to determine the effect of bFGF on these promoter activities, we treated the cells with 40  $\mu$ M SU5402 for 4 hours or recombinant human bFGF (25 ng/ml) for half one hour. Then the ratios of Firefly to Renilla Luciferase activities were measured in cell lysates with the Dual Luciferase Reporter Assay System (Promega).

### Patients and follow-up

Fifty fresh HCC tissues were collected from HCC patients undergoing curative resection in the Liver Cancer Institute, Zhong Shan Hospital, Fudan University from 2010 to 2011, and were snap-frozen for ELISA analysis, and the corresponding paraffin-embedded tissues were used for immunohistochemistry staining. 12 frozen tissues were randomly chosen for western blot analysis from these cases.

Tumor specimens used in tissue microarrays (TMAs) analysis were consecutively chosen from 394 HCC

patients who underwent liver resection in our institute between 2000 and 2002. All specimens were collected as described previously [27, 39]. The clinicopathologic characteristics are summarized in Supplementary Table 4. Survival data, including overall survival (OS) and time to recurrence (TTR), were collected until March 15, 2013. The median follow-up was 64 months (range, 3.5-133 months). Postoperative treatment modalities and surveillance followed uniform guidelines [39]. OS and TTR were defined as the interval between the date of surgery and death (or the last observation point taken), or any diagnosed relapse (intrahepatic recurrence and extrahepatic metastasis), respectively [31, 34, 40]. Approval for use of human subjects was obtained from the research ethics committee of Zhong Shan Hospital.

### Immunohistochemistry

TMA's were constructed as previously reported [28, 39]. Mouse monoclonal anti-human HOXB7 (1:1,000, Abnova) was used for immunohistochemistry with a two-step protocol [31, 39]. Scores reflected the intensity and percentage of positive staining tumor cell nuclei in the whole tissue cylinder as in our previous study [34]. Overall scores <6 and  $\geq$ 6 were defined as low and high expression respectively [34]. In studies investigating the relationship between bFGF and HOXB7, three representative fields were captured under high-power magnification (200 $\times$ ) for 50 paraffin-embedded tissues and HOXB7 density was determined using Image-Pro Plus v6.2 software as previously [31].

### Statistical analysis

Statistical analyses were performed with SPSS 19.0 for Windows (IBM) and GraphPad Prism 5 software as previously described [32]. The chi-square test, Fisher's exact test, and Student's t-test were used for comparison between groups as appropriate. OS and cumulative recurrence rates were calculated by the Kaplan-Meier method and analyzed by the log-rank test. Univariate and multivariate analyses were based on the Cox proportional hazards regression model. A *P*-value <0.05 was considered statistically significant.

### ACKNOWLEDGMENTS

This study was supported by grants from the National High Technology Research and Development Program (863 Program) of China (2015AA020401), the State Key Program of National Natural Science of China (81530077), the National Natural Science Foundation of China (81372317, 81472676, 81572823, 81401967 and 81302100), the Projects from the Shanghai Science and Technology Commission (134119a1201, 14DZ1940300, 14411970200 and 14140902301), and the Strategic

Priority Research Program of the Chinese Academy of Sciences (XDA12010202). Specialized Research Fund for the Doctoral Program of Higher Education and Research Grants Council Earmarked Research Grants Joint Research Scheme (20130071140008 and 20120071120068). We thank Dr. Judith Gasson of University of California at Los Angeles for the gift of HOXB7-pCDNA3 plasmid, Yuan Ji, M.D., Ph.D. and Hai-Ying Zeng for expertise in immunohistochemistry, and Shanghai HongLi Biological Technology for Technical Support in CHIP.

## CONFLICTS OF INTEREST

Authors have no conflicts to interest.

## REFERENCES

1. Torre LA, Bray F, Siegel RL, Ferlay J, Lortet-Tieulent J, Jemal A. Global cancer statistics, 2012. *CA Cancer J Clin.* 2015; 65:87-108.
2. Sherman M. Recurrence of hepatocellular carcinoma. *N Engl J Med.* 2008; 359:2045-7.
3. Malz M, Pinna F, Schirmacher P, Breuhahn K. Transcriptional regulators in hepatocarcinogenesis--key integrators of malignant transformation. *J Hepatol.* 2012; 57:186-95.
4. Darnell JE Jr. Transcription factors as targets for cancer therapy. *Nat Rev Cancer.* 2002; 2:740-9.
5. Shah N, Sukumar S. The Hox genes and their roles in oncogenesis. *Nat Rev Cancer.* 2010; 10:361-71.
6. Brumatti G, Salmanidis M, Kok CH, Bilardi RA, Sandow JJ, Silke N, Mason K, Visser J, Jabbour AM, Glaser SP, Okamoto T, Bouillet P, D'Andrea RJ, et al. HoxA9 regulated Bcl-2 expression mediates survival of myeloid progenitors and the severity of HoxA9-dependent leukemia. *Oncotarget.* 2013; 4:1933-47. doi: 10.3390/ijms161024574.
7. Wang SS, Wuputra K, Liu CJ, Lin YC, Chen YT, Chai CY, Lin CS, Kuo KK, Tsai MH, Wang SW, Chen KK, Miyoshi H, Nakamura Y, et al. Oncogenic function of the homeobox A13-long noncoding RNA HOTTIP-insulin growth factor-binding protein 3 axis in human gastric cancer. *Oncotarget.* 2016; 7:36049-64. doi: 10.18632/oncotarget.9102.
8. Liao WT, Jiang D, Yuan J, Cui YM, Shi XW, Chen CM, Bian XW, Deng YJ, Ding Y. HOXB7 as prognostic factor and mediator of colorectal cancer progression. *Clin Cancer Res.* 2011; 17:3569-78.
9. Wu X, Chen H, Parker B, Rubin E, Zhu T, Lee JS, Argani P, Sukumar S. HOXB7, a homeodomain protein, is overexpressed in breast cancer and confers epithelial-mesenchymal transition. *Cancer Res.* 2006; 66:9527-34.
10. Care A, Silvani A, Meccia E, Mattia G, Stoppacciaro A, Parmiani G, Peschle C, Colombo MP. HOXB7 constitutively activates basic fibroblast growth factor in melanomas. *Mol Cell Biol.* 1996; 16:4842-51.
11. Yuan W, Zhang X, Xu Y, Li S, Hu Y, Wu S. Role of HOXB7 in regulation of progression and metastasis of human lung adenocarcinoma. *Mol Carcinog.* 2014; 53:49-57.
12. Care A, Silvani A, Meccia E, Mattia G, Peschle C, Colombo MP. Transduction of the SkBr3 breast carcinoma cell line with the HOXB7 gene induces bFGF expression, increases cell proliferation and reduces growth factor dependence. *Oncogene.* 1998; 16:3285-9.
13. Cai JQ, Xu XW, Mou YP, Chen K, Pan Y, Wu D. Upregulation of HOXB7 promotes the tumorigenesis and progression of gastric cancer and correlates with clinical characteristics. *Tumour Biol.* 2016; 7:36049-64.
14. Komatsu H, Iguchi T, Masuda T, Ueda M, Kidogami S, Ogawa Y, Nambara S, Sato K, Hu Q, Saito T, Hirata H, Sakimura S, Uchi R, et al. HOXB7 Expression is a Novel Biomarker for Long-term Prognosis After Resection of Hepatocellular Carcinoma. *Anticancer Res.* 2016; 36:2767-73.
15. Christofori G. New signals from the invasive front. *Nature.* 2006; 441:444-50.
16. Bodzin AS. Hepatocellular carcinoma (HCC) recurrence and what to do when it happens. *Hepatobiliary Surg Nutr.* 2016; 5:503-5.
17. Hsieh YH, Wu TT, Huang CY, Hsieh YS, Hwang JM, Liu JY. p38 mitogen-activated protein kinase pathway is involved in protein kinase Calpha-regulated invasion in human hepatocellular carcinoma cells. *Cancer Res.* 2007; 67:4320-7.
18. Qin LX, Tang ZY. Recent progress in predictive biomarkers for metastatic recurrence of human hepatocellular carcinoma: a review of the literature. *J Cancer Res Clin Oncol.* 2004; 130:497-513.
19. Marubashi S, Nagano H, Wada H, Kobayashi S, Eguchi H, Takeda Y, Tanemura M, Umeshita K, Doki Y, Mori M. Clinical significance of alpha-fetoprotein mRNA in peripheral blood in liver resection for hepatocellular carcinoma. *Ann Surg Oncol.* 2011; 18:2200-9.
20. Debruyne EN, Delanghe JR. Diagnosing and monitoring hepatocellular carcinoma with alpha-fetoprotein: new aspects and applications. *Clin Chim Acta.* 2008; 395:19-26.
21. Fransvea E, Angelotti U, Antonaci S, Giannelli G. Blocking transforming growth factor-beta up-regulates E-cadherin and reduces migration and invasion of hepatocellular carcinoma cells. *Hepatology.* 2008; 47:1557-66.
22. Ying J, Li H, Cui Y, Wong AH, Langford C, Tao Q. Epigenetic disruption of two proapoptotic genes MAPK10/JNK3 and PTPN13/FAP-1 in multiple lymphomas and carcinomas through hypermethylation of a common bidirectional promoter. *Leukemia.* 2006; 20:1173-5.
23. Stark MS, Woods SL, Gartside MG, Bonazzi VF, Dutton-Regester K, Aoude LG, Chow D, Sereduk C, Niemi NM, Tang N, Ellis JJ, Reid J, Zismann V, et al. Frequent somatic mutations in MAP3K5 and MAP3K9 in metastatic



- melanoma identified by exome sequencing. *Nat Genet.* 2012; 44:165-9.
24. Liu RX, Wang WQ, Ye L, Bi YF, Fang H, Cui B, Zhou WW, Dai M, Zhang J, Li XY, Ning G. p21-activated kinase 3 is overexpressed in thymic neuroendocrine tumors (carcinoids) with ectopic ACTH syndrome and participates in cell migration. *Endocrine.* 2010; 38:38-47.
  25. Li Y, Tian B, Yang J, Zhao L, Wu X, Ye SL, Liu YK, Tang ZY. Stepwise metastatic human hepatocellular carcinoma cell model system with multiple metastatic potentials established through consecutive *in vivo* selection and studies on metastatic characteristics. *J Cancer Res Clin Oncol.* 2004; 130:460-8.
  26. Yaron Y, McAdara JK, Lynch M, Hughes E, Gasson JC. Identification of novel functional regions important for the activity of HOXB7 in mammalian cells. *J Immunol.* 2001; 166:5058-67.
  27. Yang XR, Xu Y, Yu B, Zhou J, Li JC, Qiu SJ, Shi YH, Wang XY, Dai Z, Shi GM, Wu B, Wu LM, Yang GH, et al. CD24 is a novel predictor for poor prognosis of hepatocellular carcinoma after surgery. *Clin Cancer Res.* 2009; 15:5518-27.
  28. Yang XR, Xu Y, Yu B, Zhou J, Qiu SJ, Shi GM, Zhang BH, Wu WZ, Shi YH, Wu B, Yang GH, Ji Y, Fan J. High expression levels of putative hepatic stem/progenitor cell biomarkers related to tumour angiogenesis and poor prognosis of hepatocellular carcinoma. *Gut.* 2010; 59:953-62.
  29. Sun HX, Xu Y, Yang XR, Wang WM, Bai H, Shi RY, Nayar SK, Devbhandari RP, He YZ, Zhu QF, Sun YF, Hu B, Khan M, et al. Hypoxia inducible factor 2 alpha inhibits hepatocellular carcinoma growth through the transcription factor dimerization partner 3/ E2F transcription factor 1-dependent apoptotic pathway. *Hepatology.* 2013; 57:1088-97.
  30. Wang Y, Wang W, Wang L, Wang X, Xia J. Regulatory mechanisms of interleukin-8 production induced by tumour necrosis factor-alpha in human hepatocellular carcinoma cells. *J Cell Mol Med.* 2012; 16:496-506.
  31. Zhou SL, Dai Z, Zhou ZJ, Wang XY, Yang GH, Wang Z, Huang XW, Fan J, Zhou J. Overexpression of CXCL5 mediates neutrophil infiltration and indicates poor prognosis for hepatocellular carcinoma. *Hepatology.* 2012; 56:2242-54.
  32. Tao ZH, Wan JL, Zeng LY, Xie L, Sun HC, Qin LX, Wang L, Zhou J, Ren ZG, Li YX, Fan J, Wu WZ. miR-612 suppresses the invasive-metastatic cascade in hepatocellular carcinoma. *J Exp Med.* 2013; 210:789-803.
  33. Peng YF, Shi YH, Ding ZB, Ke AW, Gu CY, Hui B, Zhou J, Qiu SJ, Dai Z, Fan J. Autophagy inhibition suppresses pulmonary metastasis of HCC in mice via impairing anoikis resistance and colonization of HCC cells. *Autophagy.* 2013; 9:2056-68.
  34. Li JC, Yang XR, Sun HX, Xu Y, Zhou J, Qiu SJ, Ke AW, Cui YH, Wang ZJ, Wang WM, Liu KD, Fan J. Up-regulation of Kruppel-like factor 8 promotes tumor invasion and indicates poor prognosis for hepatocellular carcinoma. *Gastroenterology.* 2010; 139:2146-57 e12.
  35. Mohammadi M, McMahon G, Sun L, Tang C, Hirth P, Yeh BK, Hubbard SR, Schlessinger J. Structures of the tyrosine kinase domain of fibroblast growth factor receptor in complex with inhibitors. *Science (New York, NY).* 1997; 276:955-60.
  36. Bertrand N, Medevielle F, Pituello F. FGF signalling controls the timing of Pax6 activation in the neural tube. *Development.* 2000; 127:4837-43.
  37. Shi YH, Wang YX, Bingle L, Gong LH, Heng WJ, Li Y, Fang WG. *In vitro* study of HIF-1 activation and VEGF release by bFGF in the T47D breast cancer cell line under normoxic conditions: involvement of PI-3K/Akt and MEK1/ERK pathways. *J Pathol.* 2005; 205:530-6.
  38. Zhang X, Yang XR, Sun C, Hu B, Sun YF, Huang XW, Wang Z, He YF, Zeng HY, Qiu SJ, Cao Y, Fan J, Zhou J. Promyelocytic leukemia protein induces arsenic trioxide resistance through regulation of aldehyde dehydrogenase 3 family member A1 in hepatocellular carcinoma. *Cancer Lett.* 2015; 366:112-22.
  39. Gao Q, Qiu SJ, Fan J, Zhou J, Wang XY, Xiao YS, Xu Y, Li YW, Tang ZY. Intratumoral balance of regulatory and cytotoxic T cells is associated with prognosis of hepatocellular carcinoma after resection. *J Clin Oncol.* 2007; 25:2586-93.
  40. Llovet JM, Di Bisceglie AM, Bruix J, Kramer BS, Lencioni R, Zhu AX, Sherman M, Schwartz M, Lotze M, Talwalkar J, Gores GJ, Panel of Experts in HCCDCT. Design and endpoints of clinical trials in hepatocellular carcinoma. *J Natl Cancer Inst.* 2008; 100:698-711.
